# Supplementary material for: Chalcogenodiazolo[3,4-c]pyridine based donor–acceptor–donor polymers for green and near-infrared electrochromics
Source: Royal Society of Chemistry journal article supplement (doi:10.1039/c5py01321f), 2015-01-01
Supplement: c5py01321f1.pdf [file c5py01321f1.pdf]

## Electronic supplementary information

### Chalcogenodiazolo[3,4-*c*]pyridine based Donor-Acceptor- Donor Polymers for Green and Near-Infrared Electrochromics

Shouli Ming, Shijie Zhen, Ximei Liu, Kaiwen Lin, Hongtao Liu, Yao Zhao, Baoyang Lu\* and

Jingkun Xu\*

*School of Pharmacy, Jiangxi Science and Technology Normal University, Nanchang*

*330013*

\*: Corresponding authors. Tel: 86-791-88537967, Fax: 86-791-83823320.

Email: [lby1258@163.com](mailto:lby1258@163.com); [xujingkun@tsinghua.org.cn](mailto:xujingkun@tsinghua.org.cn).

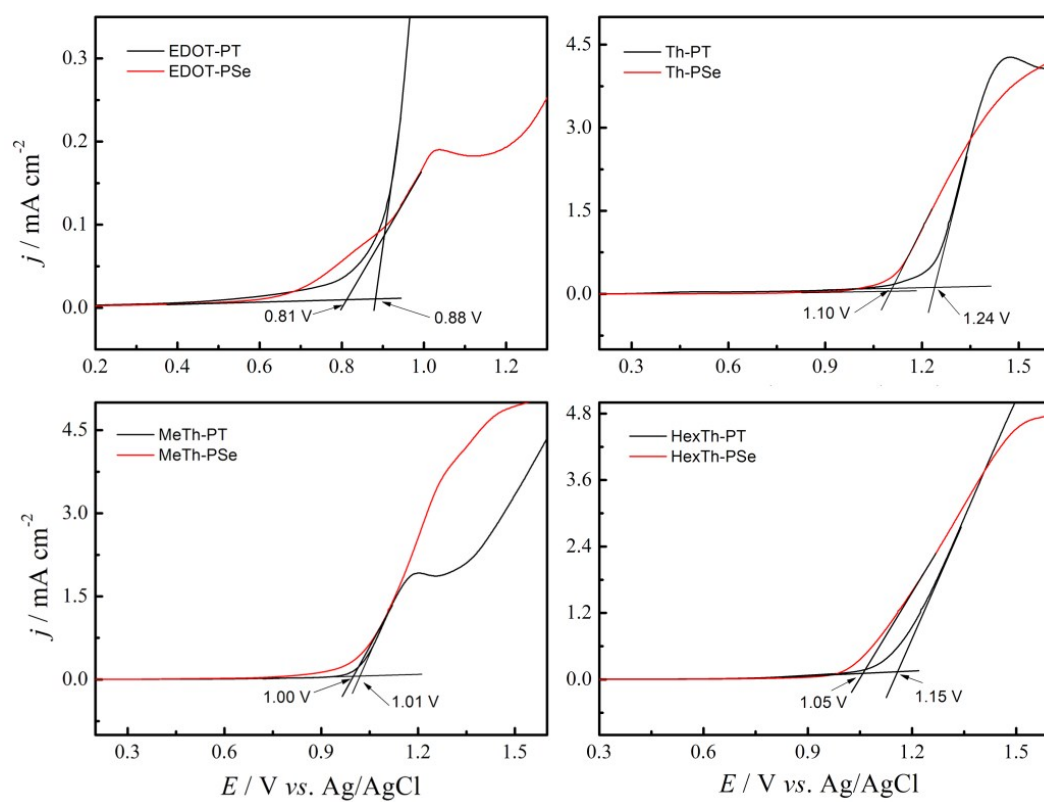

**Fig. S1** Anodic polarization curves of  $5 \text{ mmol L}^{-1}$  these monomers in  $\text{CH}_2\text{Cl}_2$ -

$\text{Bu}_4\text{NPF}_6$  ( $0.1 \text{ mol L}^{-1}$ ) as indicated. Potential scan rate:  $50 \text{ mV s}^{-1}$ .

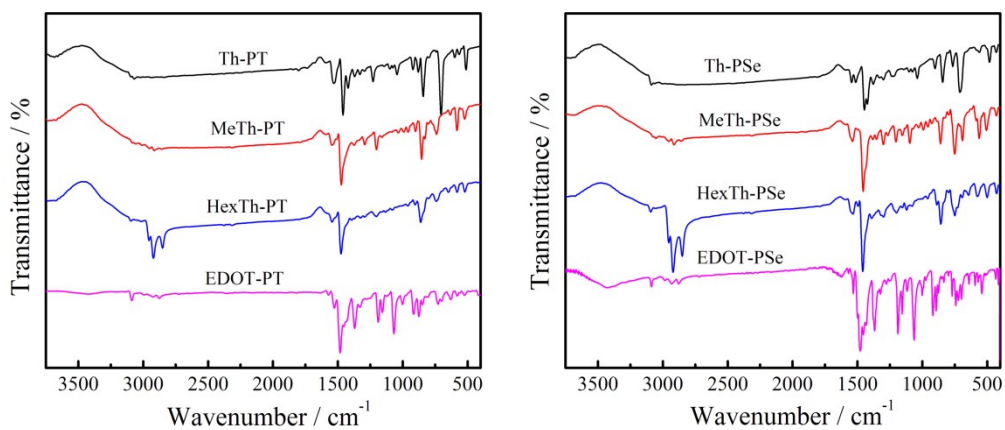

**Fig. S2** FT-IR spectra of these D-A-D monomers as indicated.

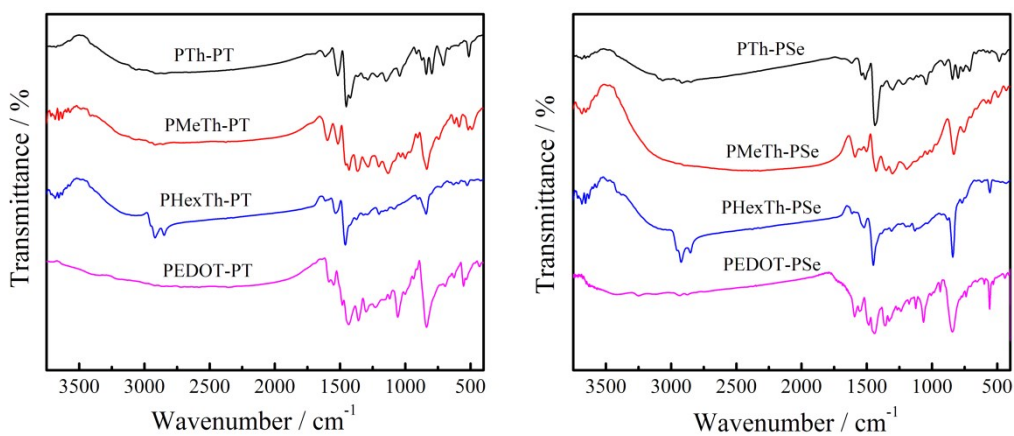

**Fig. S3** FT-IR spectra of these D-A-D polymers as indicated.

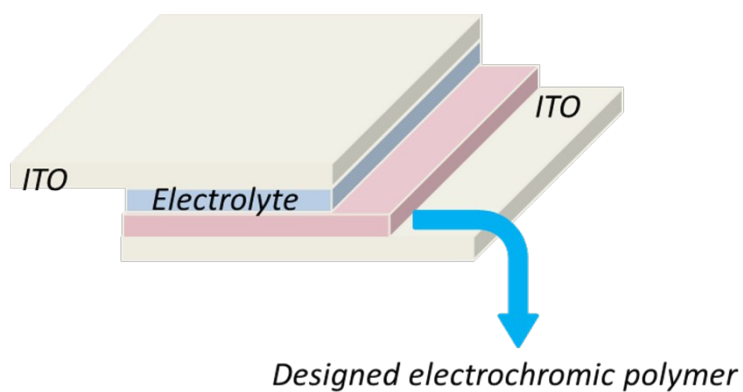

**Fig. S4** The schematic representation of a polymer electrochromic device.

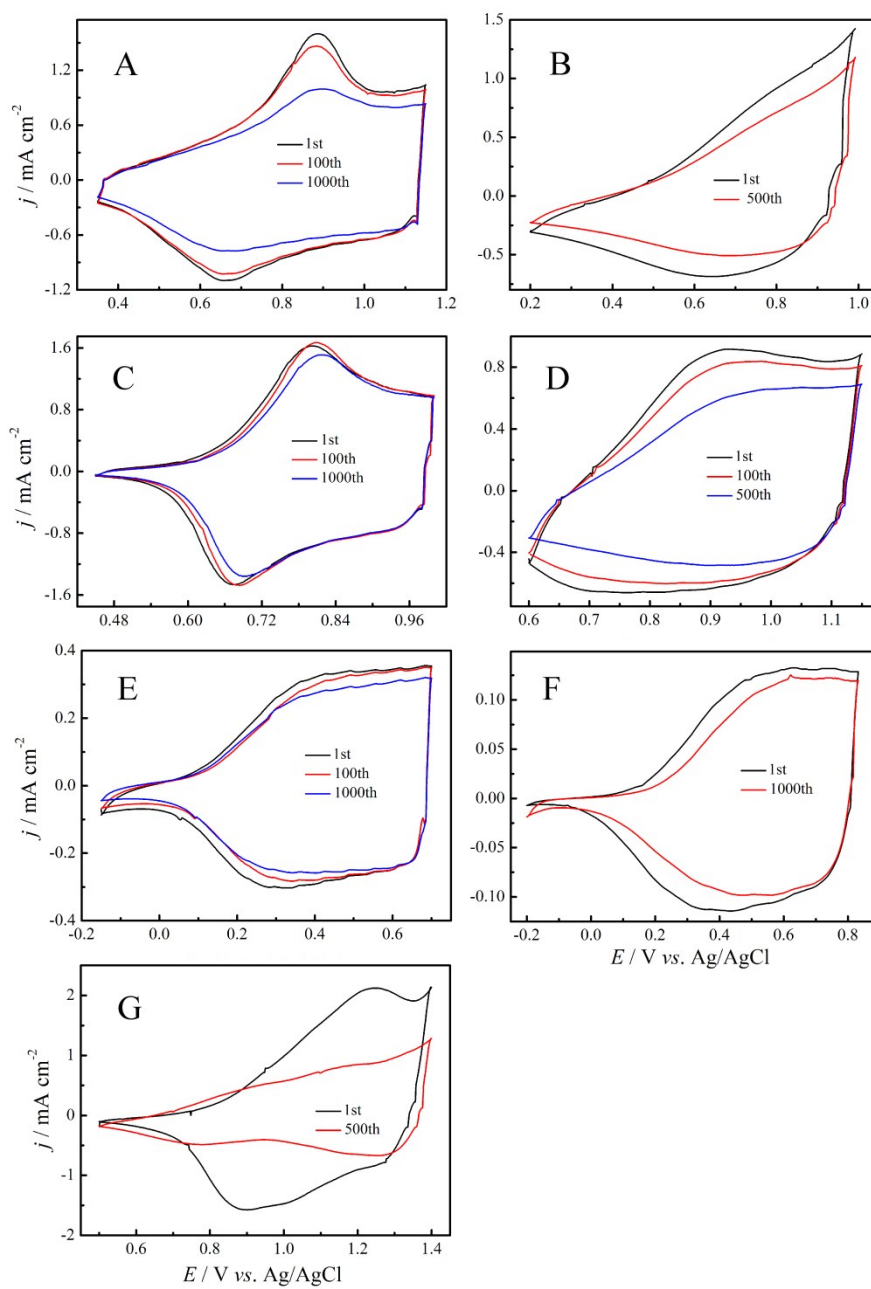

**Fig. S5** Long-term CVs of the ECDs in monomer-free  $\text{CH}_2\text{Cl}_2\text{-Bu}_4\text{NPF}_6$  (0.10 mol L<sup>-1</sup>). Potential scan rate: 150 mV s<sup>-1</sup>. PMeTh-PT (A), PMeTh-PSe (B), PHexTh-PT (C), PHexTh-PSe (D), PEDOT-PT (E), PEDOT-PSe (F), and PTh-PT (G).

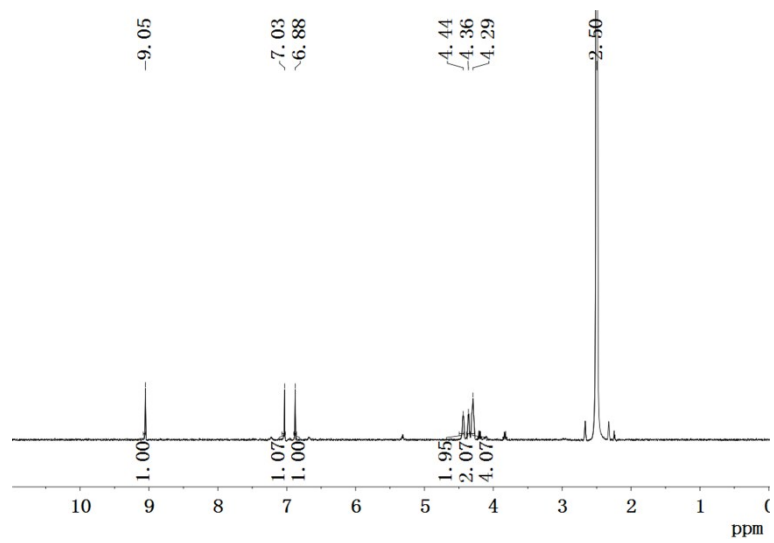

**Fig. S6**  $^1\text{H}$  NMR spectrum of EDOT-PSe in  $\text{DMSO-}d_6$ .

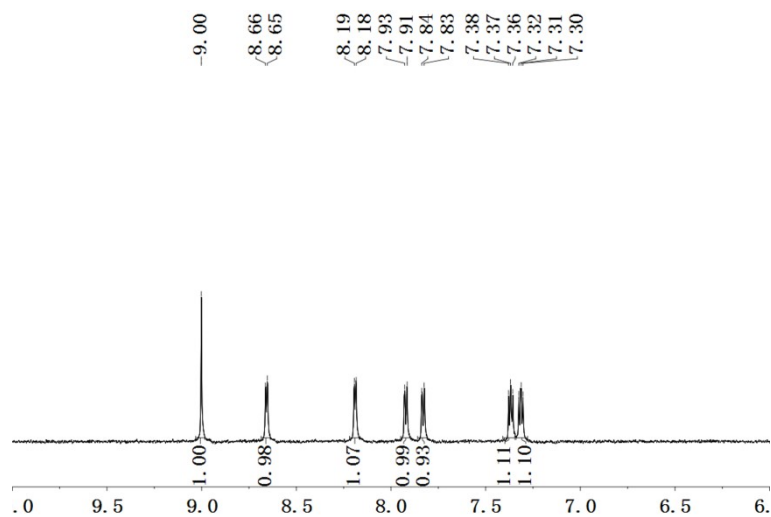

**Fig. S7**  $^1\text{H}$  NMR spectrum of Th-PT in  $\text{DMSO-}d_6$ .

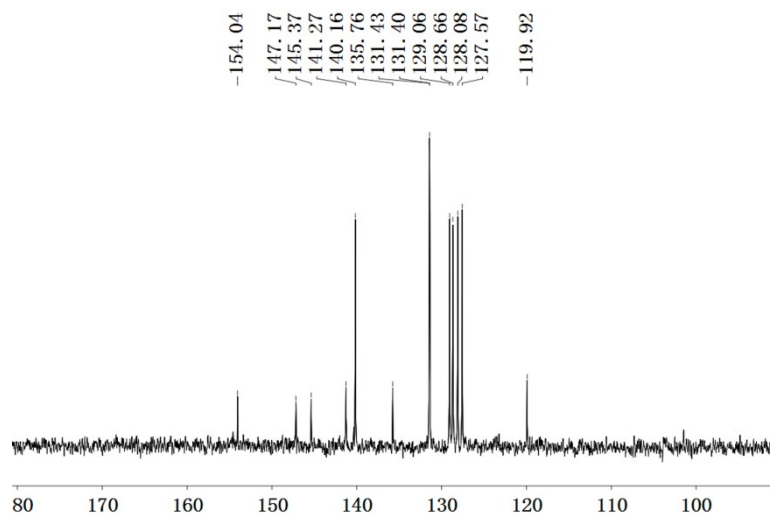

**Fig. S8**  $^{13}\text{C}$  NMR spectrum of Th-PT in  $\text{DMSO-}d_6$ .

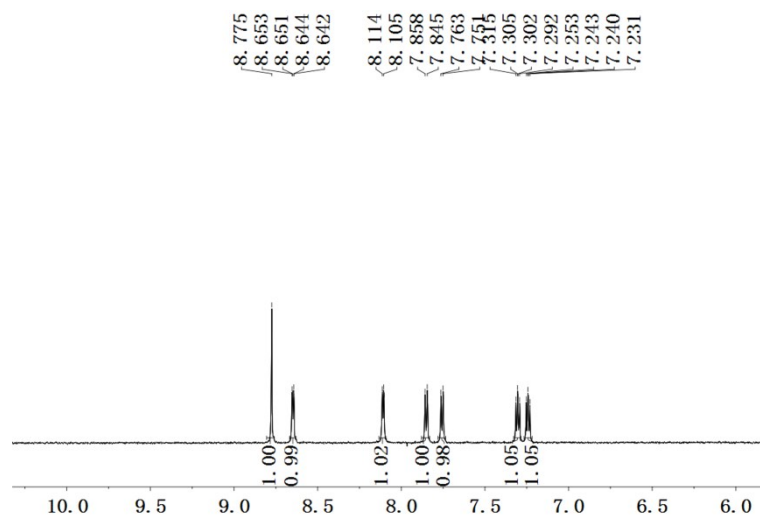

**Fig. S9**  $^1\text{H}$  NMR spectrum of Th-PSe in  $\text{DMSO-}d_6$ .

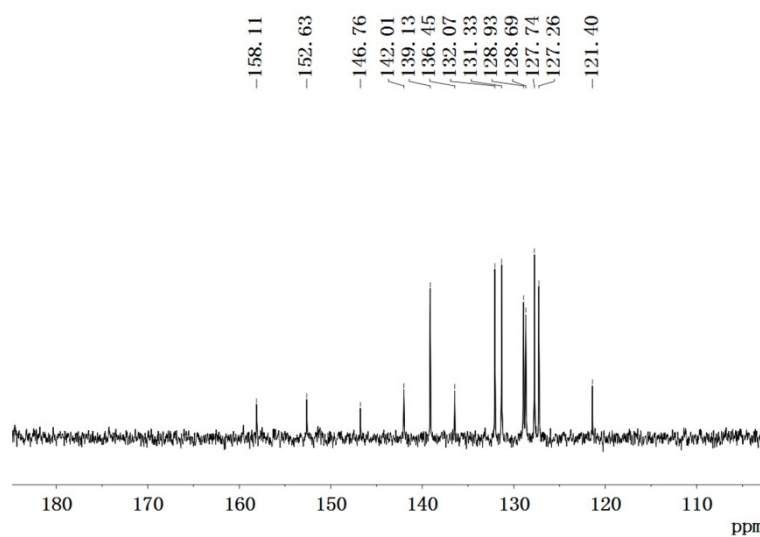

**Fig. S10**  $^{13}\text{C}$  NMR spectrum of Th-PSe in  $\text{DMSO-}d_6$ .

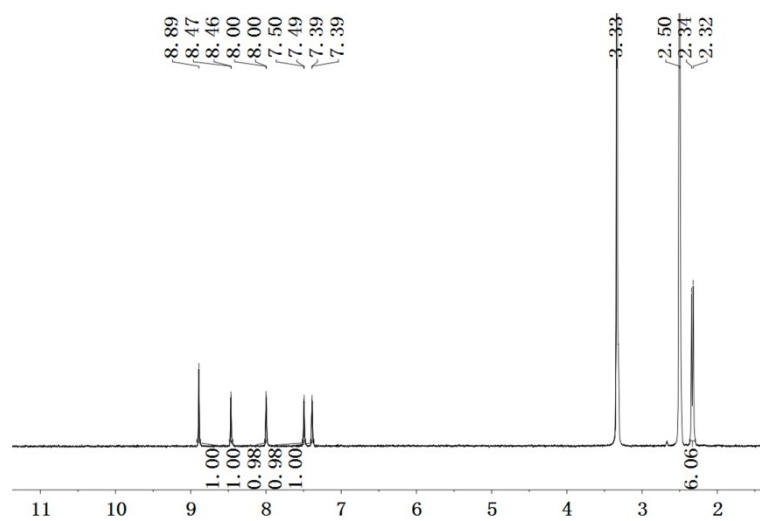

**Fig. S11**  $^1\text{H}$  NMR spectrum of MeTh-PT in  $\text{DMSO-}d_6$ .

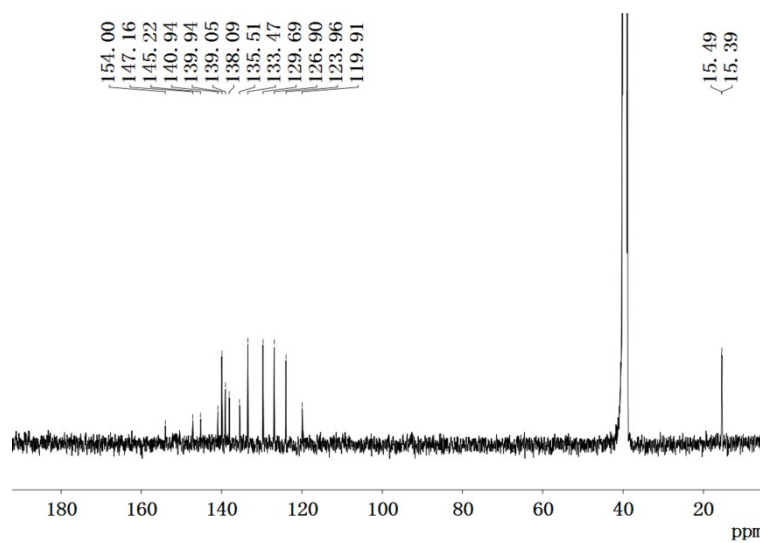

**Fig. S12**  $^{13}\text{C}$  NMR spectrum of MeTh-PT in  $\text{DMSO-}d_6$ .



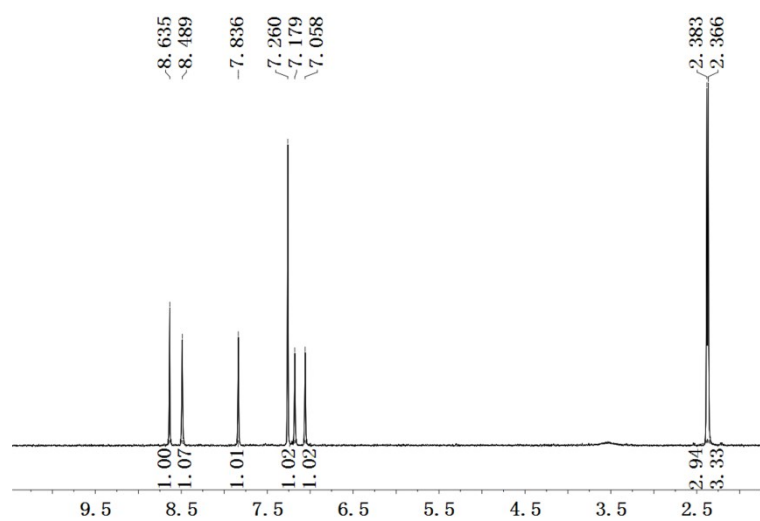

**Fig. S13**  $^1\text{H}$  NMR spectrum of MeTh-PSe in  $\text{CDCl}_3$ .

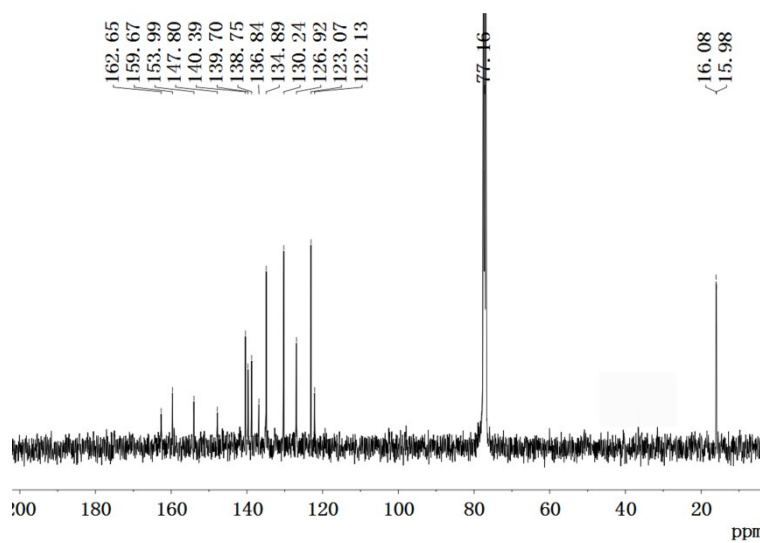

**Fig. S14**  $^{13}\text{C}$  NMR spectrum of MeTh-PSe in  $\text{CDCl}_3$ .

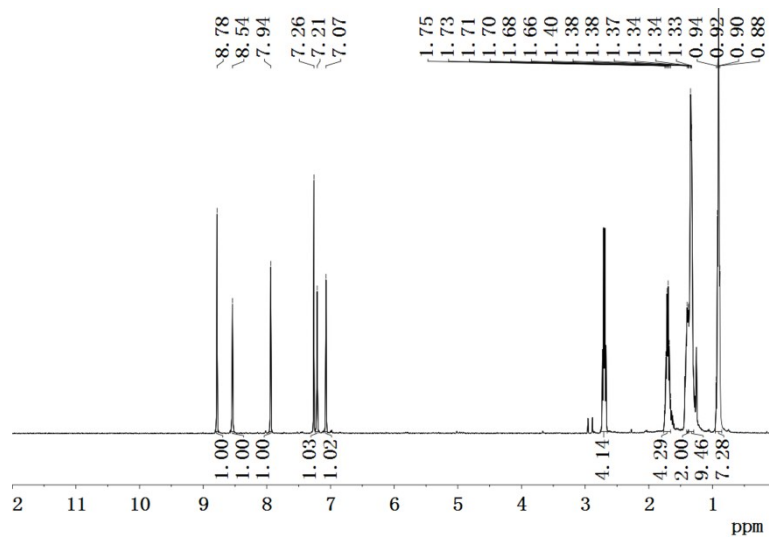

**Fig S15**  $^1\text{H}$  NMR spectrum of HexTh-PT in  $\text{CDCl}_3$ .

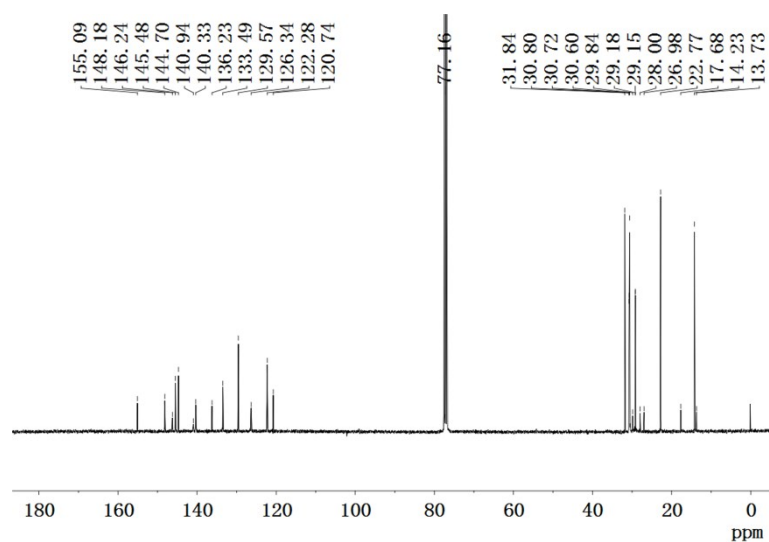

**Fig. S16**  $^{13}\text{C}$  NMR spectrum of HexTh-PT in  $\text{CDCl}_3$ .

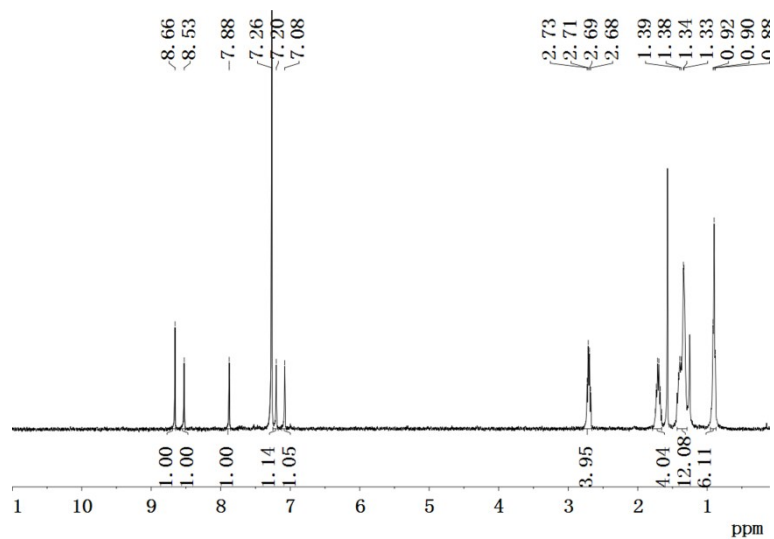

**Fig. S17**  $^1\text{H}$  NMR spectrum of HexTh-PSe in  $\text{CDCl}_3$ .

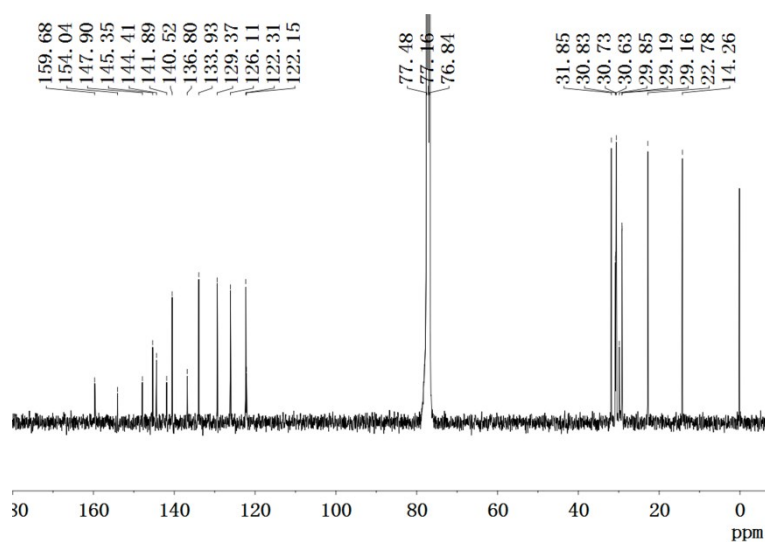

**Fig. S18**  $^{13}\text{C}$  NMR spectrum of HexTh-PSe in  $\text{CDCl}_3$ .

**Table S1** Comparison between observed peaks of EDOT-PT/PSe monomers and corresponding polymers.

| Peak (cm <sup>-1</sup> )          |                       | Assignment                              |
|-----------------------------------|-----------------------|-----------------------------------------|
| EDOT-PT/EDOT-PSe                  | PEDOT-PT/PEDOT-PSe    |                                         |
| 3088/3088                         | --                    | =C–H vibration of thiophene             |
| 2924/2935                         | 2927/2941             | =C–H vibration of pyridine              |
| 1573, 1526/1570, 1533             | 1587, 1551/1591, 1553 | ring vibration of substituted pyridine  |
| 1481, 1454, 1431/1479, 1455, 1433 | 1485, 1433/1485, 1443 | ring vibration of substituted thiophene |
| 1371/1368                         | 1358/1360             | C–C stretching                          |
| 1067/1064                         | 1066/1066             | C–O stretching                          |
| 1188/1188                         | --                    | =C–H in-plane of thiophene              |
| 916/920                           | 933/937               | =C–H out-of-plane of pyridine           |
| 874/894                           | --                    | =C–H out-of-plane of thiophene          |
| --                                | 840                   | PF <sub>6</sub> <sup>-</sup>            |

**Table S2** Comparison between observed peaks of Th-PT/PSe monomers and corresponding polymers.

| Peak (cm <sup>-1</sup> ) |                        | Assignment                              |
|--------------------------|------------------------|-----------------------------------------|
| Th-PT/Th-PSe             | PTh-PT/PTh-PSe         |                                         |
| 3097, 3070/3090          | --                     | =C–H vibration of thiophene             |
| 1530/1544, 1516          | 1518/1539, 1510        | ring vibration of substituted pyridine  |
| 1462, 1422/1449, 1422    | 1452, 1422/1441        | ring vibration of substituted thiophene |
| 1188/1037                | --                     | =C–H in-plane of thiophene              |
| 924/903                  | 914/903                | =C–H out-of-plane of pyridine           |
| 843/877, 844             | overlap/873,839 (weak) | =C–H out-of-plane of thiophene          |
| --                       | 840                    | PF <sub>6</sub> <sup>-</sup>            |

**Table S3** Comparison between observed peaks of MeTh-PT/PSe monomers and corresponding polymers.

| Peak (cm <sup>-1</sup> )          |                       | Assignment                              |
|-----------------------------------|-----------------------|-----------------------------------------|
| MeTh-PT/MeTh-PSe                  | PMeTh-PT/PMeTh-PSe    |                                         |
| 3084/3076                         | --                    | =C-H vibration of thiophene             |
| 2918/2914                         | 2918/2914             | -CH <sub>3</sub> vibration              |
| 1549/1539                         | 1600, 1516/1589, 1539 | ring vibration of substituted pyridine  |
| 1481, 1454, 1431/1479, 1455, 1433 | 1485, 1433/1485, 1443 | ring vibration of substituted thiophene |
| 1292/1296                         | 1283/1303             | C-C stretching                          |
| 1200/1203                         | --                    | =C-H in-plane of thiophene              |
| 901/--                            | 905/--                | =C-H out-of-plane of pyridine           |
| 854,827/860                       | --                    | =C-H out-of-plane of thiophene          |
| --                                | 840                   | PF <sub>6</sub> <sup>-</sup>            |

**Table S4** Comparison between observed peaks of HexTh-PT/PSe monomers and corresponding polymers.

| Peak (cm <sup>-1</sup> )          |                                   | Assignment                                |
|-----------------------------------|-----------------------------------|-------------------------------------------|
| HexTh-PT/HexTh-PSe                | PHexTh-PT/PHexTh-PSe              |                                           |
| 3093/3094                         | --                                | =C–H vibration of thiophene               |
| 2955, 2922, 2851/2957, 2922, 2853 | 2953, 2920, 2849/2957, 2924, 2853 | –C <sub>6</sub> H <sub>13</sub> vibration |
| 1545/1519                         | 1539/1522                         | ring vibration of substituted pyridine    |
| 1476/1496, 1458                   | 1485, 1433/1485, 1443             | ring vibration of substituted thiophene   |
| 1292/1298                         | 1319/1311                         | C–C stretching                            |
| 1203/1197                         | --                                | =C–H in-plane of thiophene                |
| 960/962                           | weak                              | =C–H out-of-plane of pyridine             |
| 862/889, 860                      | --                                | =C–H out-of-plane of thiophene            |
| --                                | 840                               | PF <sub>6</sub> <sup>-</sup>              |

**Table S5 Electrochromic parameters for PEDOT-PSe**

| polymer | wavelength | $T_{\text{red}}$ | $T_{\text{ox}}$ | $\Delta T$ | response time (s) |           | $CE$<br>( $\text{cm}^2/\text{C}$ ) |
|---------|------------|------------------|-----------------|------------|-------------------|-----------|------------------------------------|
|         |            |                  |                 |            | oxidation         | reduction |                                    |
| PEDOT-  | 433 nm     | 59%              | 71%             | 12%        | 0.50              | 0.45      | 60                                 |
| PSe     | 1200 nm    | 73%              | 51%             | 22%        | 0.30              | 0.60      | 174                                |

**Table S6 Electrochromic parameters for PTh-PT**

| polymer | wavelength | $T_{\text{red}}$ | $T_{\text{ox}}$ | $\Delta T$ | response time (s) |           | $CE$<br>( $\text{cm}^2/\text{C}$ ) |
|---------|------------|------------------|-----------------|------------|-------------------|-----------|------------------------------------|
|         |            |                  |                 |            | oxidation         | reduction |                                    |
| PTh-PT  | 375 nm     | 50%              | 56%             | 6%         | 4.0               | 0.8       | 30                                 |
|         | 575 nm     | 51%              | 55%             | 4%         | 3.8               | 0.4       | 28                                 |
|         | 1000 nm    | 88%              | 61%             | 27%        | 4.0               | 2.0       | 91                                 |

**Table S7 Electrochromic parameters for PTh-PSe**

| polymer | wavelength | $T_{\text{red}}$ | $T_{\text{ox}}$ | $\Delta T$ | response time (s) |           | $CE$<br>( $\text{cm}^2/\text{C}$ ) |
|---------|------------|------------------|-----------------|------------|-------------------|-----------|------------------------------------|
|         |            |                  |                 |            | oxidation         | reduction |                                    |
| PTh-PSe | 1000 nm    | 60%              | 52%             | 8%         | 3.8               | 4.0       | 33                                 |

**Table S8 Electrochromic parameters for PMeTh-PT**

| polymer  | wavelength | $T_{\text{red}}$ | $T_{\text{ox}}$ | $\Delta T$ | response time (s) |           | $CE$<br>( $\text{cm}^2/\text{C}$ ) |
|----------|------------|------------------|-----------------|------------|-------------------|-----------|------------------------------------|
|          |            |                  |                 |            | oxidation         | reduction |                                    |
| PMeTh-PT | 380 nm     | 14 %             | 28 %            | 14 %       | 3.8               | 2.0       | 66                                 |
|          | 619 nm     | 16%              | 21%             | 6%         | 2.4               | 3.8       | 28                                 |
|          | 1000 nm    | 88%              | 51%             | 37%        | 3.8               | 3.4       | 55                                 |



**Table S9 Electrochromic parameters for PMeTh-PSe**

| polymer   | wavelength | $T_{\text{red}}$ | $T_{\text{ox}}$ | $\Delta T$ | response time (s) |           | $CE$<br>( $\text{cm}^2/\text{C}$ ) |
|-----------|------------|------------------|-----------------|------------|-------------------|-----------|------------------------------------|
|           |            |                  |                 |            | oxidation         | reduction |                                    |
| PMeTh-PSe | 1000 nm    | 60%              | 46%             | 14%        | 3.4               | 3.2       | 17                                 |

**Table S10 Electrochromic parameters for PHexTh-PT**

| polymer   | wavelength | $T_{\text{red}}$ | $T_{\text{ox}}$ | $\Delta T$ | response time (s) |           | $CE$<br>( $\text{cm}^2/\text{C}$ ) |
|-----------|------------|------------------|-----------------|------------|-------------------|-----------|------------------------------------|
|           |            |                  |                 |            | oxidation         | reduction |                                    |
| PHexTh-PT | 1000 nm    | 94%              | 89%             | 5%         | 3.4               | 0.8       | 37                                 |

**Table S11 Electrochromic parameters for PHexTh-PSe**

| polymer    | wavelength | $T_{\text{red}}$ | $T_{\text{ox}}$ | $\Delta T$ | response time (s) |           | $CE$<br>( $\text{cm}^2/\text{C}$ ) |
|------------|------------|------------------|-----------------|------------|-------------------|-----------|------------------------------------|
|            |            |                  |                 |            | oxidation         | reduction |                                    |
| PHexTh-PSe | 600 nm     | 10 %             | 11 %            | 1 %        | --                | --        | --                                 |
|            | 1000 nm    | 57 %             | 39 %            | 18 %       | 3.6               | 3.6       | 66                                 |
